# Supplementary material
Source: Springer Nature journal article supplement (https://www.springermedizin.de/resource/supplementary/12982_2004_6_MOESM3_ESM.pdf/9604188)
Supplement: MOESM3 [file 9604188]

A) Transit routes

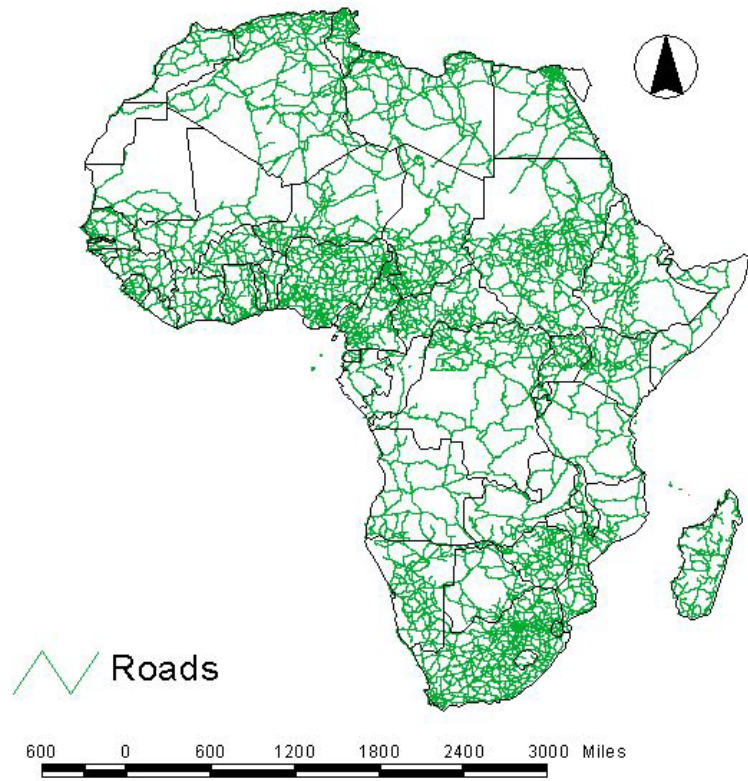

B) Population distribution

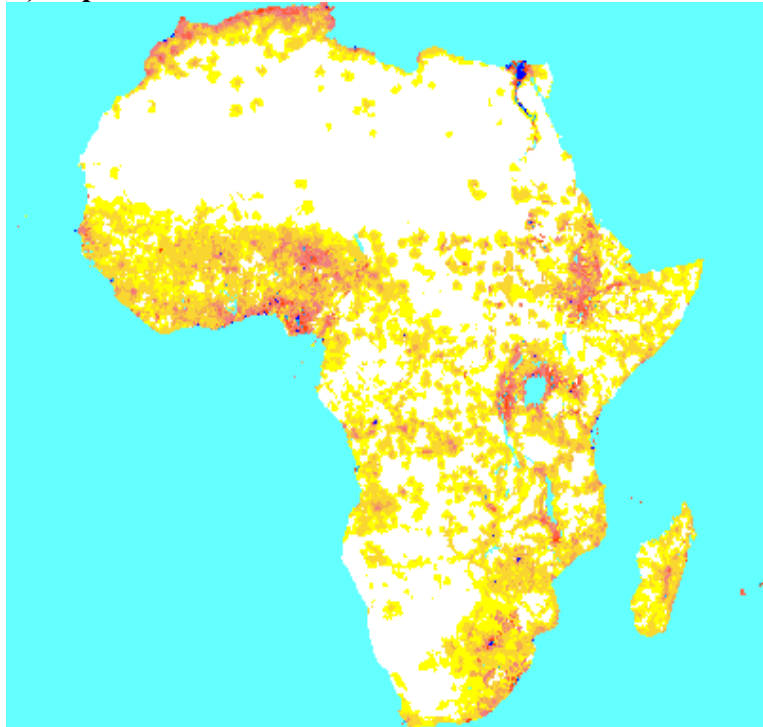

C) HIV Prevalence in Africa, end 2001

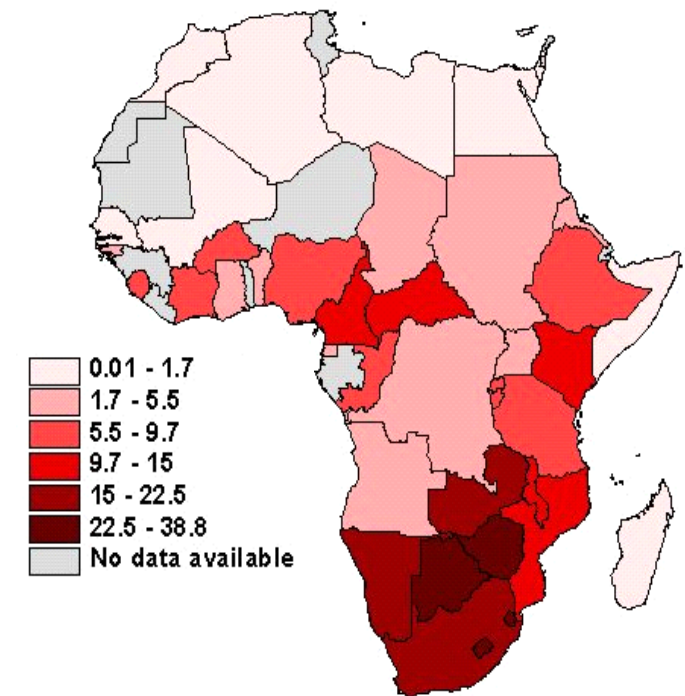

D) Prevalence and Magnitude of Conflicts in Africa

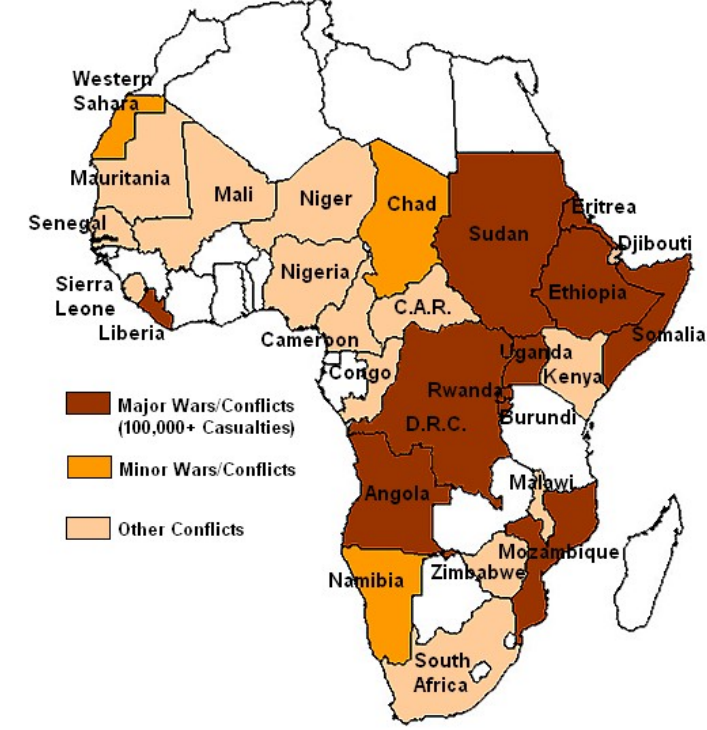

Sources:  
 A) Digital Chart of the World, <http://www.maproom.psu.edu/dcw/>  
 B) African Population Database, [http://www.geog.ucsb.edu/~kline/global\\_map/regional/datasets/afpopdb.htm](http://www.geog.ucsb.edu/~kline/global_map/regional/datasets/afpopdb.htm)  
 C) UNAIDS. July 2002. *Report on the Global Aids Epidemic*. Geneva: UNAIDS.  
 D) Adapted from: CERTI. October 2000. *Demobilization and its Implications for HIV/AIDS*.
